# Supplementary material for: Fiber-optic probes for real-time pH monitoring
Source: Royal Society of Chemistry journal article supplement (doi:10.1039/d4sd00012a), 2024-01-01
Supplement: d4sd00012a1.pdf [file d4sd00012a1.pdf]

# Fiber-Optic Probes for Real-Time pH Monitoring

*Mohamed Elsherif<sup>a,b\*</sup>, Fahad Alam<sup>a,c</sup>, Ahmed E. Salih<sup>a</sup>, Xinyu Wang<sup>d</sup>, Peter R. Corridon<sup>e,f,g</sup>,*

*Khalil B. Ramadi<sup>b,h</sup>, Haider Butt<sup>a\*</sup>*

<sup>a</sup>Department of Mechanical Engineering, Khalifa University, Abu Dhabi 127788, UAE

<sup>b</sup>Division of Engineering, New York University Abu Dhabi, Abu Dhabi 129188, UAE

<sup>c</sup>Department of Electrical and Computer Engineering, King Abdullah University (KAUST) 23955, SA

<sup>d</sup>Department of Biomedical Engineering, Khalifa University, Abu Dhabi 127788, UAE

<sup>e</sup>Department of Immunology and Physiology, College of Medicine and Health Science, Khalifa University, Abu Dhabi 127788, UAE

<sup>f</sup>Healthcare Engineering Innovation Center, Khalifa University, Abu Dhabi 127788, UAE

<sup>g</sup>Center for Biotechnology, Khalifa University, Abu Dhabi 127788, UAE

<sup>h</sup>Tandon School of Engineering, New York University, NY 11201, USA

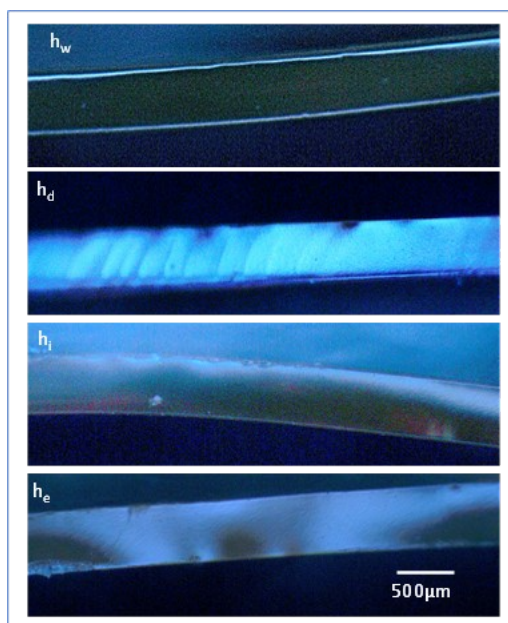

**Figure S1.** Optical microscope images for cross-sections of the free-standing developed pH-responsive sensors, the sensor's thickness is 500  $\mu\text{m}$ .

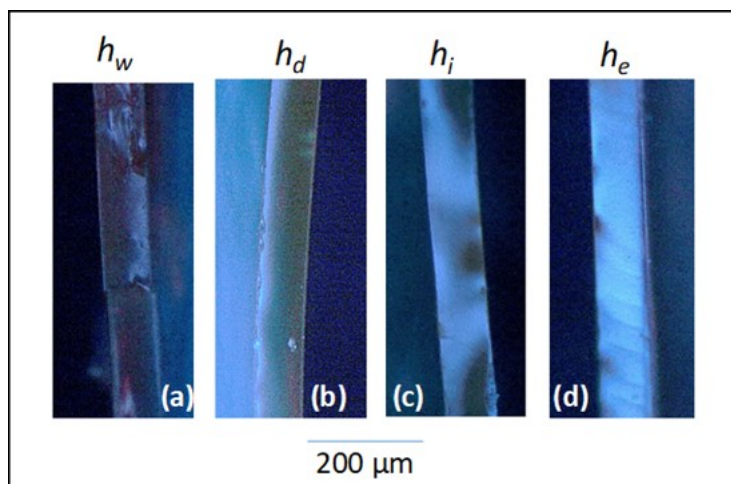

**Figure S2.** Cross-section of the developed thin pH-responsive sensors. (a-d) optical microscope images for the cross-section of the pH sensors based on deionized water, DMSO, isopropanol, and ethanol as the red dye's solvents, respectively.

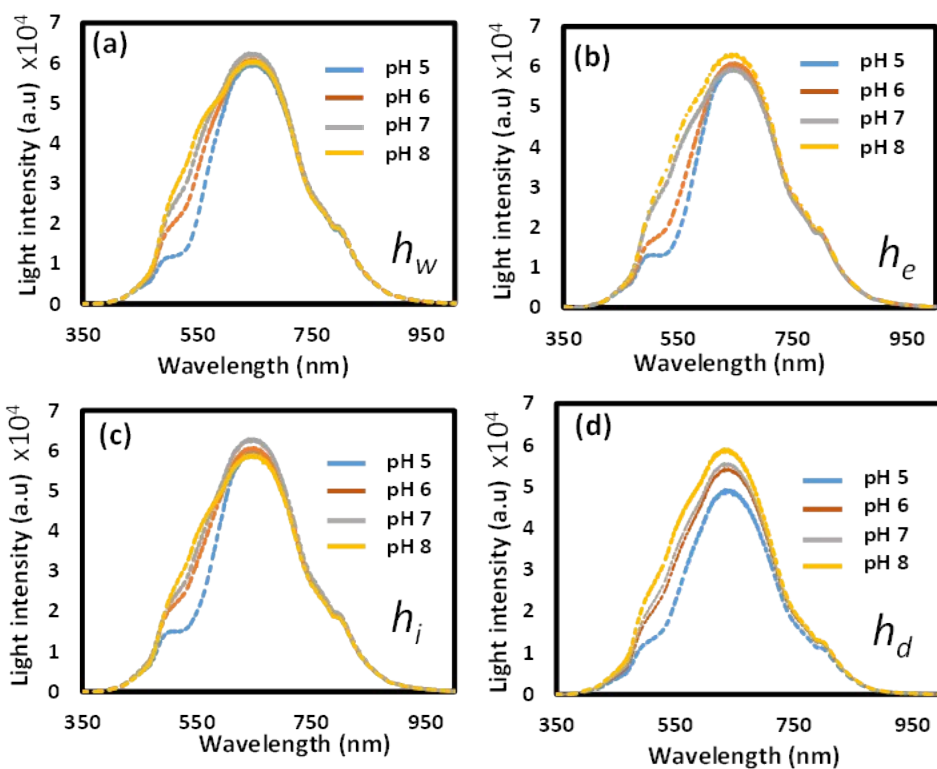

**Figure S3.** Light intensity measurements for the four sensors while the sensors were exposed to media of different pH: (a)  $h_w$ , (b)  $h_e$ , (c)  $h_i$ , and (d)  $h_d$ .

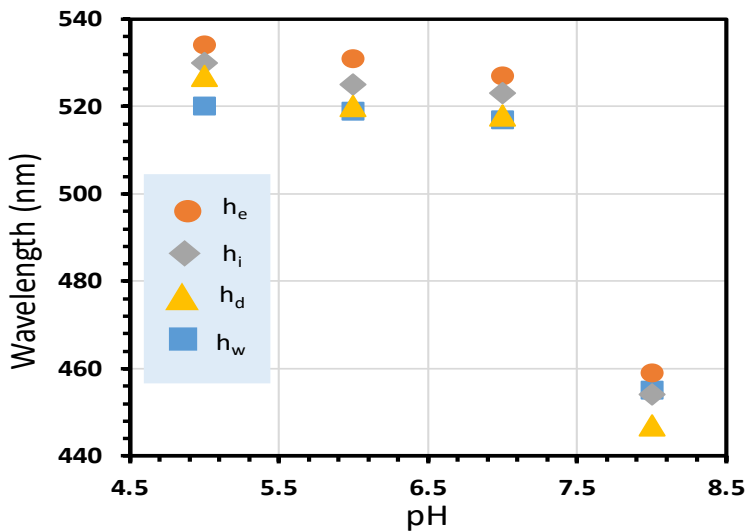

**Figure S4.** Absorption peak positions for the developed four sensors while they were immersed in different pH buffers.

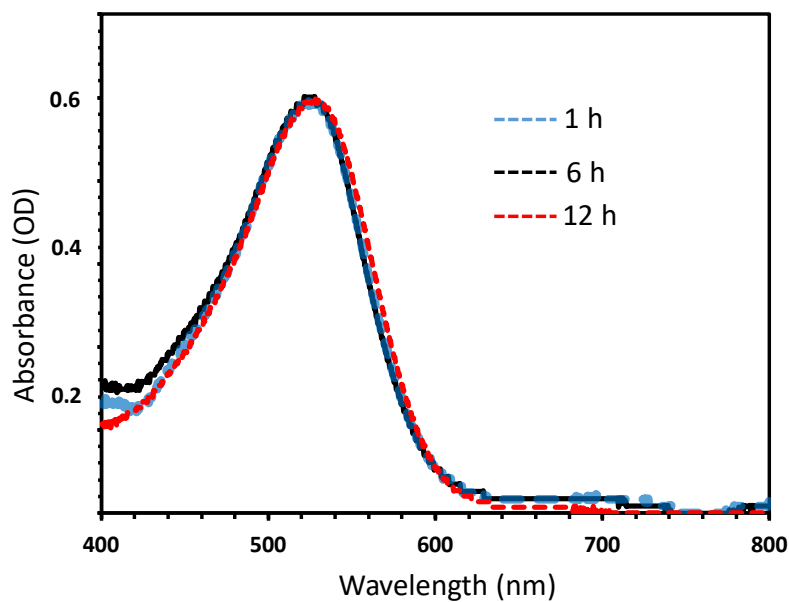

**Figure S5.** Absorbance of the  $h_w$  sensor recorded over time while the sensor was stored in PBS buffer.

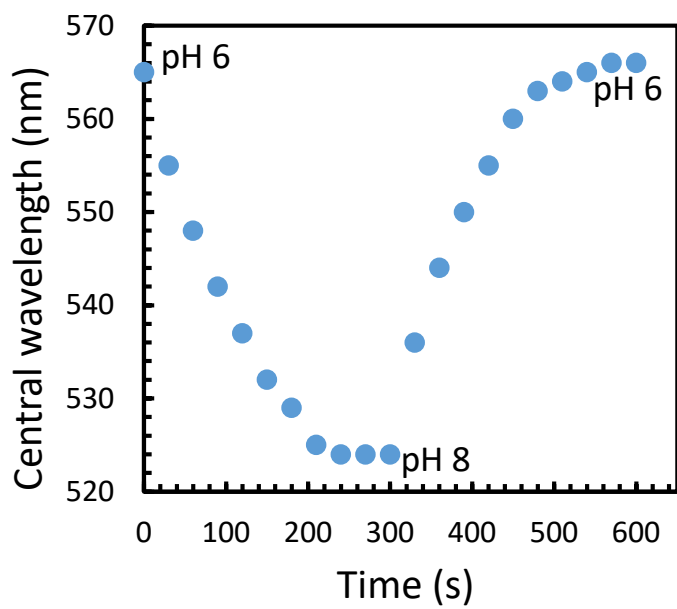

**Figure S6.** The kinetic response of the fiber's tip-attached pH sensor for a complete cycle in media of pH 6 and 8.
